# Supplementary material for: Analysis of co-expression and gene regulatory networks associated with sterile lemma development in rice
Source: PubMed Central journal article supplement (PMC9817312; doi:10.1186/s12870-022-04012-x), 2023-01-06
Supplement: 12870_2022_4012_MOESM1_ESM.pdf [file 12870_2022_4012_MOESM1_ESM.pdf]

**A**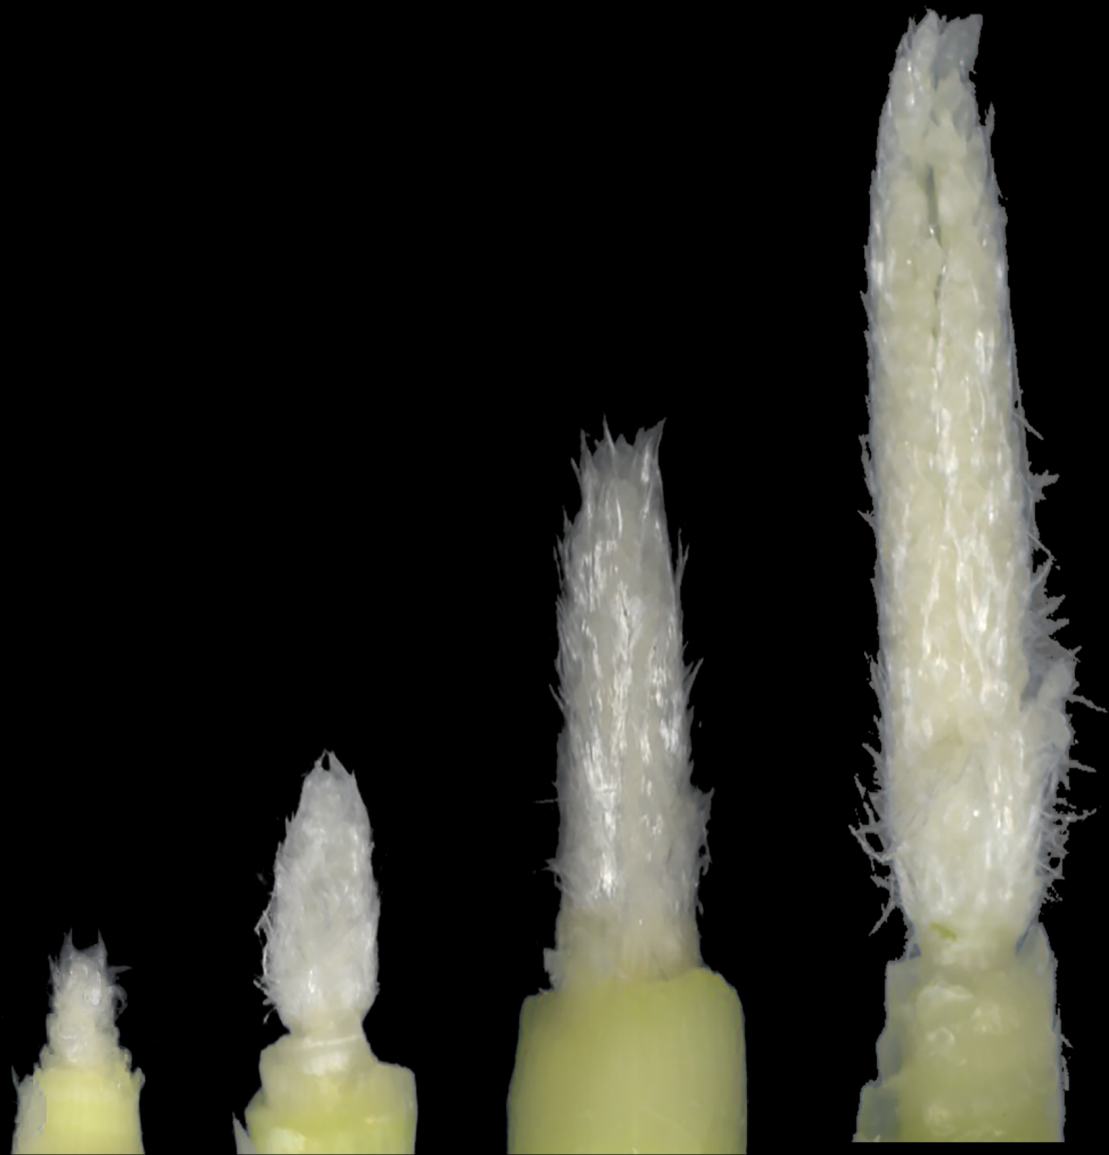**S1****S2****S3****S4****B**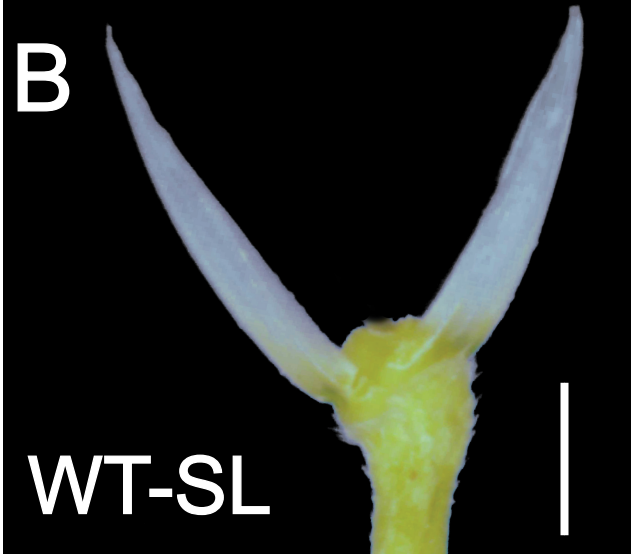**WT-SL****C**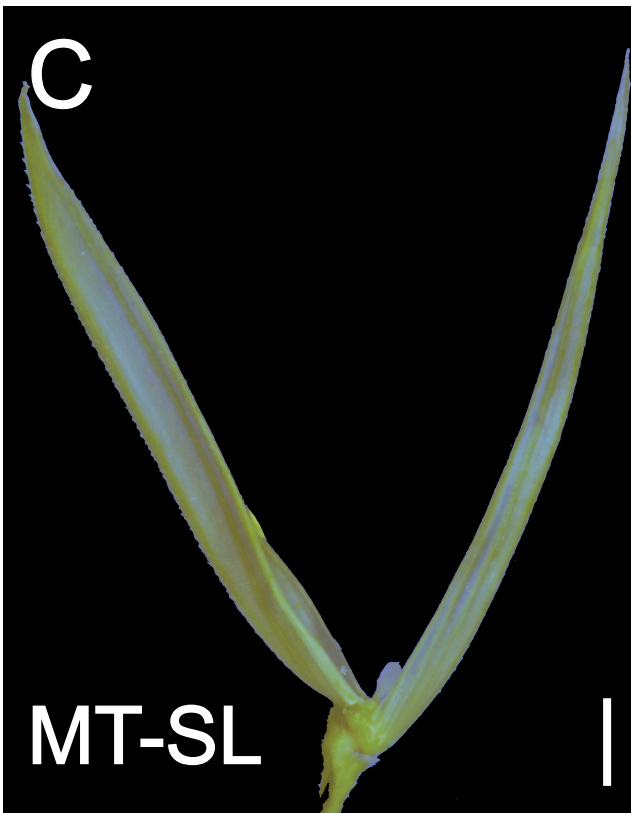**MT-SL**

**Fig. S1.** Sampling point of wild type and mutant. scale bar=1 mm.
