# Supplementary material for: Analysis of co-expression and gene regulatory networks associated with sterile lemma development in rice
Source: PubMed Central journal article supplement (PMC9817312; doi:10.1186/s12870-022-04012-x), 2023-01-06
Supplement: 12870_2022_4012_MOESM4_ESM.pdf [file 12870_2022_4012_MOESM4_ESM.pdf]

CC:intracellular organelle  
 MF:DNA-binding transcription factor activity  
 BP:response to acid chemical

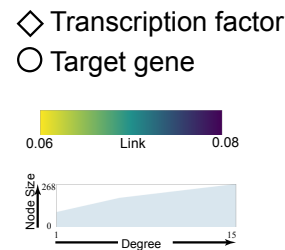

Module assigned by WGCNA

- Brown
- Yellow
- Black
- Turquoise
- Blue
- Green
- Red
- Unclustered

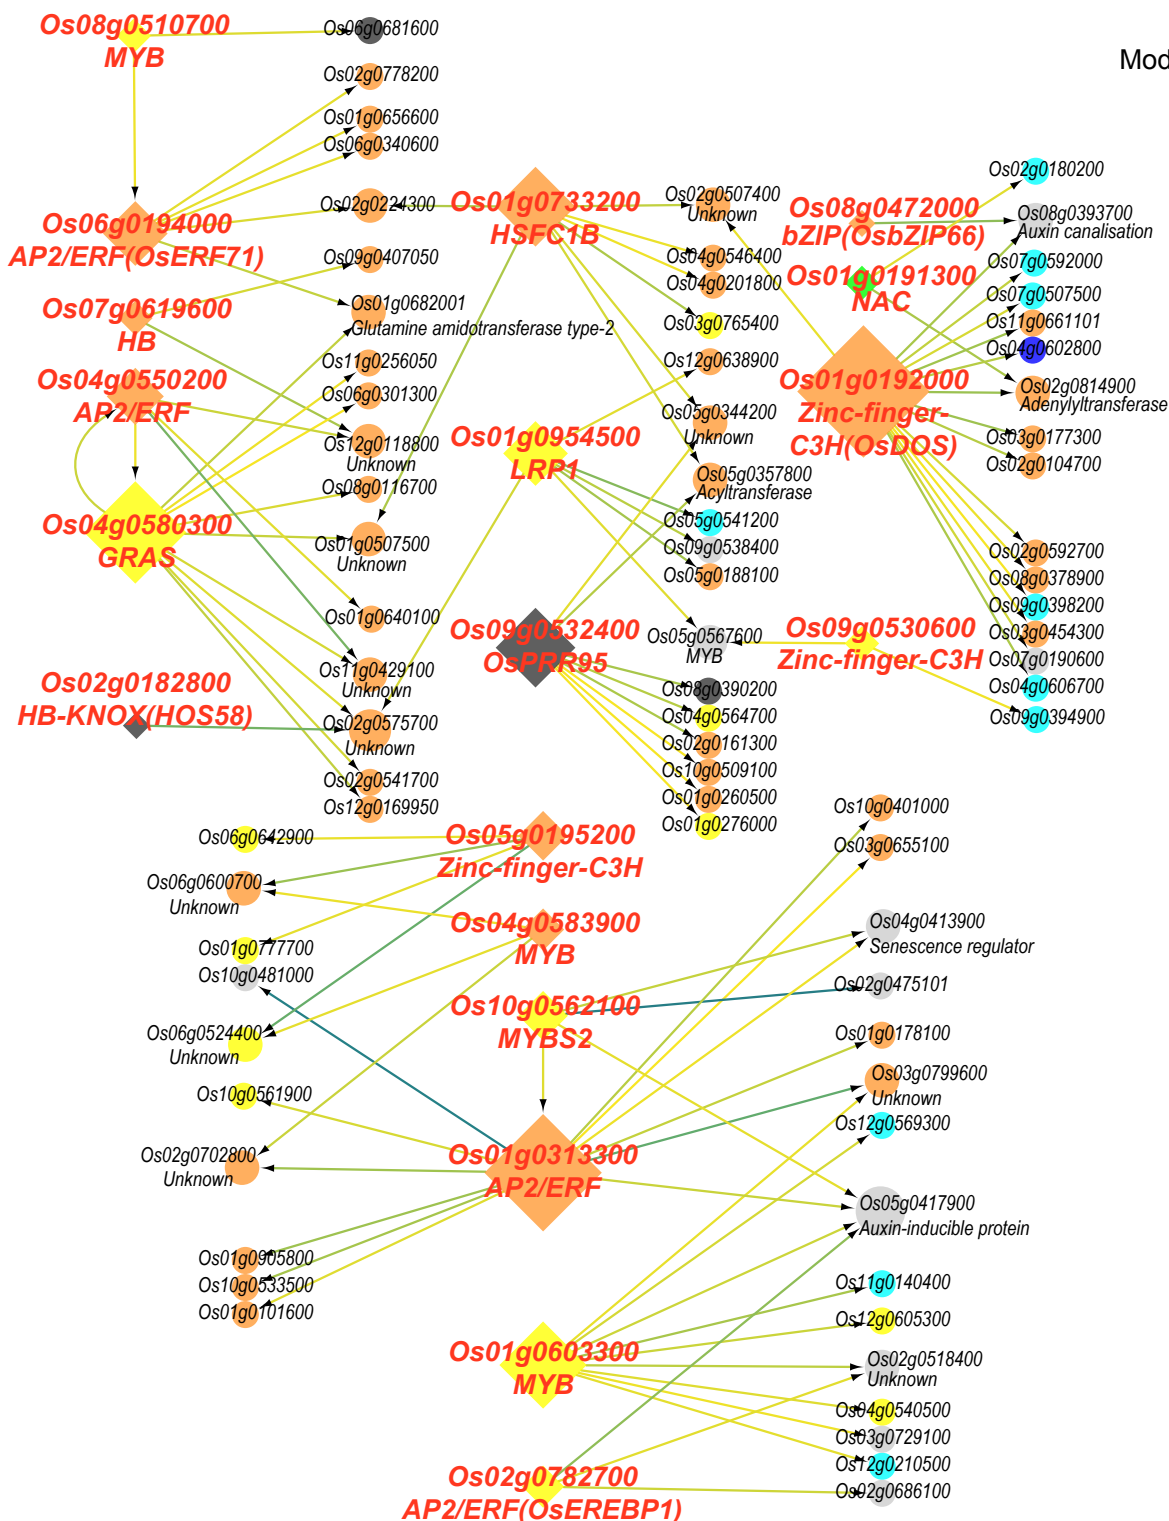

**Fig. S12.** The third type of regulatory network. The annotations in the upper left corner are the GO terms that minimize the *P*-value in the enrichment analysis of all genes in the network; CC: cell components; MF: Molecular function; BP: Biological process. Transcription factors are annotated with symbols or family names; descriptions of target genes regulated by more than two transcription factors are annotated.
