# Supplementary material for: Analysis of co-expression and gene regulatory networks associated with sterile lemma development in rice
Source: PubMed Central journal article supplement (PMC9817312; doi:10.1186/s12870-022-04012-x), 2023-01-06
Supplement: 12870_2022_4012_MOESM5_ESM.pdf [file 12870_2022_4012_MOESM5_ESM.pdf]

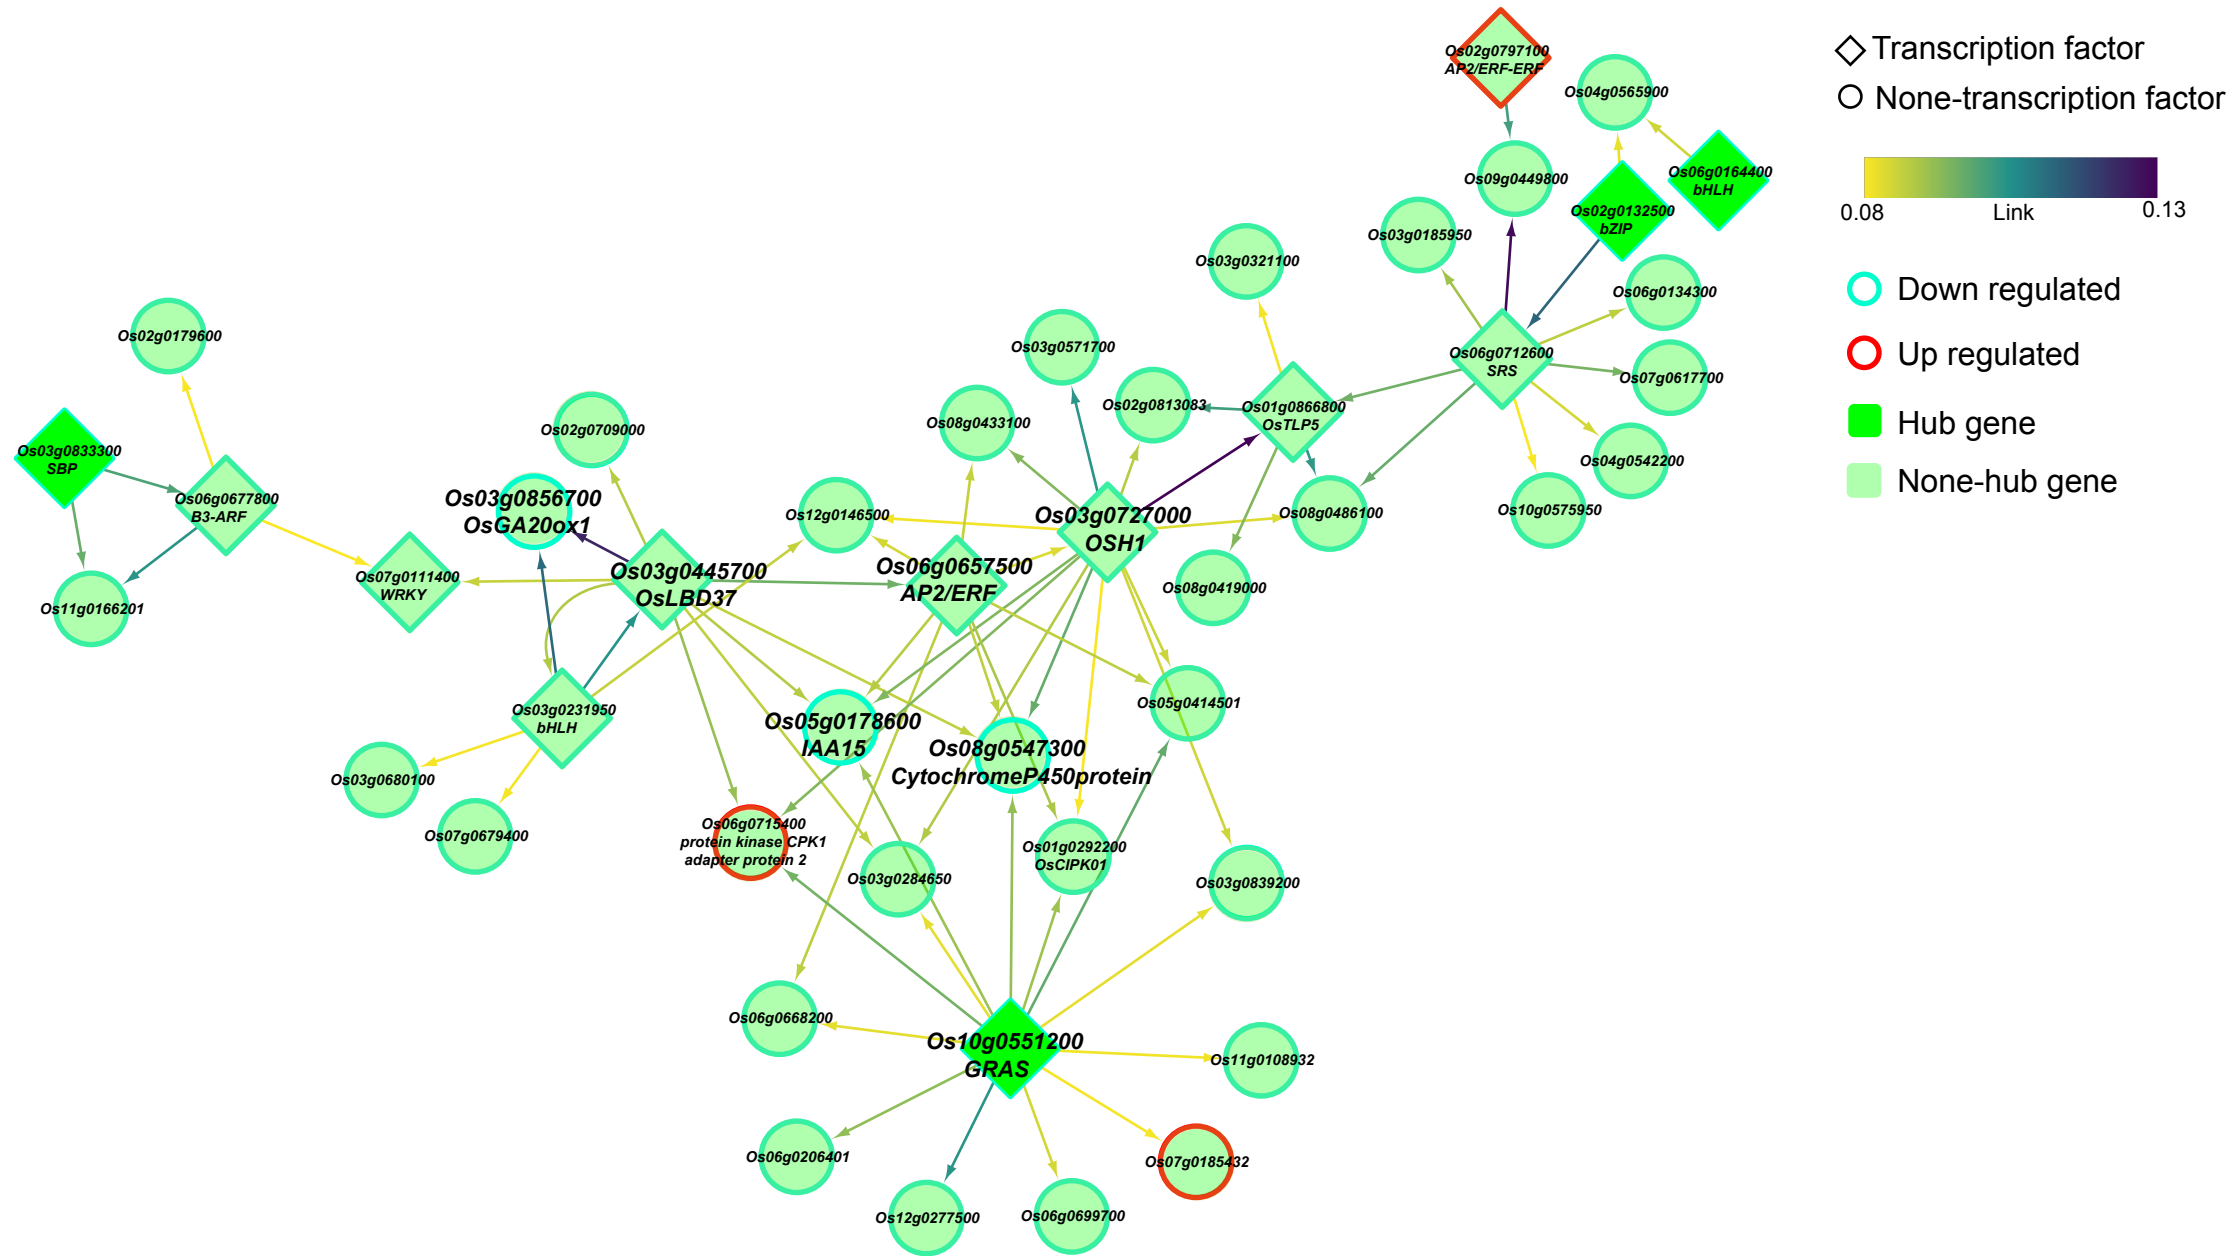

**Fig. S13.** The regulatory network in the green module. Transcription factors are annotated with symbols or family names; descriptions of target genes regulated by more than two transcription factors are annotated.
